# SITH: an R package for visualizing and analyzing a spatial model of intratumor heterogeneity

Phillip B. Nicol<sup>a</sup>, Dániel L. Barabási<sup>b</sup>, Amir Asiaee<sup>c</sup>, Kevin R. Coombes<sup>c,\*</sup>

<sup>a</sup>*Harvard College, Cambridge, MA 02138, USA.*

<sup>b</sup>*Biophysics Program, Harvard University, Cambridge, MA 02138, USA.*

<sup>c</sup>*Department of Biomedical Informatics, The Ohio State University, 1585 Neil Ave. Columbus, OH 43210, USA.*

---

## Abstract

**Motivation.** Cancer progression, including the development of intratumor heterogeneity, is inherently a spatial process. Mathematical models of tumor evolution can provide insights into patterns of heterogeneity that can emerge in the presence of spatial growth.

**Summary.** We develop SITH, an R package that implements a lattice-based stochastic model of tumor growth and mutation. SITH provides 3D interactive visualizations of the simulated tumor and highlights heavily mutated regions. SITH can produce synthetic bulk and single-cell sequencing data sets by sampling from the tumor. The streamlined API will make SITH a useful tool for investigating the relationship between spatial growth and intratumor heterogeneity.

**Availability and Implementation.** SITH is a part of CRAN and can thus be installed by running `install.packages("SITH")` from the R console. See <https://CRAN.R-project.org/package=SITH> for the user manual and package vignette.

**Keywords:** Intratumor heterogeneity, cancer progression, simulations

---

\*Corresponding author. Email: [Kevin.Coombes@osumc.edu](mailto:Kevin.Coombes@osumc.edu)

## 25 **1. Introduction**

26 A comprehensive understanding of how intratumor heterogeneity (ITH) de-  
27 velops is critical for effective cancer diagnosis and treatment (Stanta and Bonin,  
28 2018). Mathematical models of cancer evolution are a promising approach for  
29 studying ITH and are free of the ethical and logistical questions associated with  
30 collecting clinical data (Beerenwinkel et al., 2015). Although the general evolu-  
31 tionary dynamics of cancer growth are well-characterized (Michor et al., 2004),  
32 little is known about the effect of spatial growth on ITH. Developing an in-silico  
33 model that captures the evolution of a spatially embedded tumor would be a  
34 starting point for investigating this relationship. Such a model may also be  
35 useful for developing novel statistical methods which can account for samples  
36 collected from a spatially heterogeneous tumor.

37 Our package ‘A Spatial model of Intra-Tumor Heterogeneity (SITH)’ im-  
38 plements a stochastic model of 3D tumor growth and mutation. The growth  
39 model is inspired by Waclaw et al. (2015) and similar models have recently been  
40 applied to study the limitations of sequencing data in providing a representa-  
41 tive sample of a spatially heterogeneous tumor (Chkhaidze et al., 2019; Opasic  
42 et al., 2019). SITH allows users to simulate tumors with millions of cells in  
43 under a minute and provides useful features for analyzing the results. SITH  
44 can also produce synthetic single-cell and bulk sequencing data sets from the  
45 simulated tumor. SITH may prove useful in uncovering spatial biases in statis-  
46 tical methods, or as a basis for improving sampling techniques to ensure that a  
47 representative subset of the tumor population is obtained.

## 48 **2. Features**

49 The core function of SITH is `simulateTumor()`, which implements a stochas-  
50 tic model of tumor growth and mutation where cells occupy sites on a 3D lattice.  
51 The spatial component limits cell replications to unoccupied adjacent sites on  
52 the lattice. During the replication process, the daughter cells may acquire neu-  
53 tral or advantageous genetic alterations. The user can specify cell replication

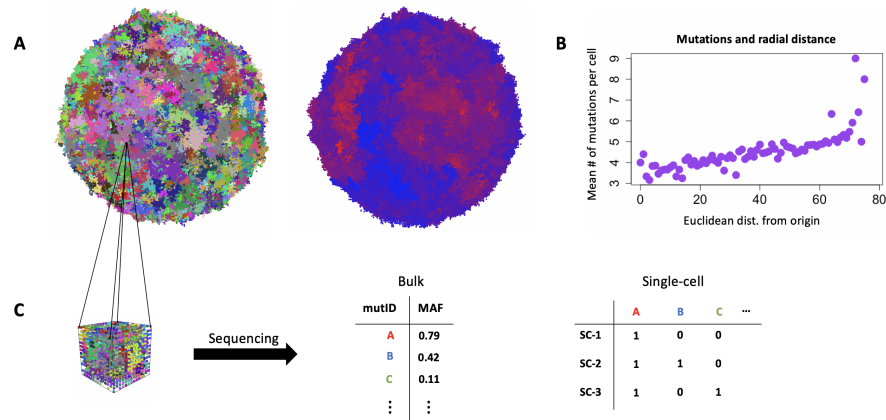

Figure 1: The main features of SITH. **A:** 3D snapshots of a simulated tumor ( $10^6$  cells). On the left, each unique genotype is assigned a color. On the right, regions with high mutation are colored red while regions with low mutation are colored blue. **B:** A plot of average mutations per cell as a function of Euclidean distance from the origin. **C:** A cube is selected from the tumor and sequenced, returning bulk or single-cell data.

54 rate, death rate, mutation rate, and selective advantage conferred to driver mu-  
 55 tations. See *Supplementary Information* for more details on the model as well  
 56 as the simulation algorithm used.

### 57 2.1. Visualization of the simulated tumor

58 In-silico tumors produced by SITH can be rendered in an interactive 3D  
 59 environment through the RGL package (Adler and Murdoch, 2020). As shown  
 60 in Figure 1A, we have implemented two modes to visualize the tumor. On  
 61 the left, each unique genotype is assigned a distinct color. On the right, cells  
 62 are colored by their mutational burden, with blue corresponding to few and  
 63 red corresponding to many mutations. To look inside the tumor, `plotSlice()`  
 64 allows the user to view any 2D cross-section.

### 65 2.2. Quantifying the spatial distribution of mutants

66 A crucial unknown for sampling tumors is how spatial growth biases the  
 67 system's distribution of genetic diversity. SITH was designed to provide a

68 sandbox for asking questions about the spatial distribution of mutants within a  
69 tumor. `spatialDistribution()` can produce relevant measurements of spatial  
70 heterogeneity, which can be either plotted through SITH or output as data for  
71 further study. The function catalogues the average number of mutations per  
72 cell at varying radial distances, as plotted in Figure 1B. The plot suggests that  
73 highly mutated cells are more commonly found near the boundary of the tu-  
74 mor. Another included measure of heterogeneity compares the average Jaccard  
75 similarity of cells separated by varying distances. One might expect that cells  
76 in the same neighborhood share more genetic similarity than cells on opposite  
77 sides of the tumor.

### 78 *2.3. Synthetic sequencing data*

79 Bulk sampling is modeled as selecting an  $n \times n \times n$  cube from the tumor  
80 to be sequenced (Figure 1C), which returns mutation allele frequencies (MAF)  
81 for each mutation. Note that unoccupied lattice sites are assumed to be normal  
82 tissue, and thus the MAF may be less than 1 even if a mutation is clonal. This  
83 procedure is clinically realistic, since it is oftentimes difficult to deconvolve can-  
84 cer cells from normal tissue (Opasic et al., 2019). `bulkSample()` makes multi-  
85 region bulk sampling easy by randomly selecting cubes or by allowing the user  
86 to input cube location. To simulate fine needle aspiration, `randomNeedles()`  
87 sequences random 1D cross sections of the tumor.

88 With `singleCell()`, the user can create synthetic single-cell sequencing data  
89 sets by either selecting cells randomly or at specified positions. Due to artifacts  
90 of sequencing technology, single-cell data sets are expected to have high noise  
91 rates (Zafar et al., 2018). To account for this, `singleCell()` allows the user to  
92 introduce false negatives and positives at a specified rate.

## 93 **3. Discussion**

94 With a straightforward API that can be used entirely within R, SITH pro-  
95 vides a biologically motivated simulation of spatial tumor growth, coupled with

96 methods for measuring ITH. Synthetic data generated from SITH can serve as  
97 the ground truth for benchmarking various computational methods. For ex-  
98 ample, the single-cell data could be used as input to various phylogenetic tree  
99 reconstruction algorithms, such as those presented in [Schwartz and Schäffer](#)  
100 (2017). Similarly, SITH can be used to test the accuracy of algorithms de-  
101 signed to estimate subclonal composition, since the true MAF for each mutation  
102 is provided.

103 Planned extensions of SITH include simulations of metastatic seeding and  
104 treatment. By analyzing cells near the tumor periphery, SITH can provide  
105 insights into the likely genetic compositions of metastases. Incorporating sim-  
106 ulations of treatment will allow for comparisons of the cancer recurrence time  
107 under a variety of surgical and therapeutic procedures.

## 108 Acknowledgements

109 D.L.B. was supported by NIH NIGMS T32 GM008313.

## 110 References

- 111 D. Adler and D. Murdoch. *rgl: 3D Visualization Using OpenGL*, 2020. URL  
112 <https://CRAN.R-project.org/package=rgl>. R package version 0.100.50.
- 113 N. Beerenwinkel, R. Schwarz, M. Gerstrung, and F. Markowetz. Cancer evolu-  
114 tion: mathematical models and computational inference. *Systematic Biology*,  
115 pages e1–e25, 2015.
- 116 K. Chkhaidze, T. Heide, B. Werner, M. Williams, W. Huang, G. Caravagna,  
117 T. Graham, and A. Sottoriva. Spatially constrained tumour growth affects the  
118 patterns of clonal selection and neutral drift in cancer genomic data. *PLOS*  
119 *Computational Biology*, 2019.
- 120 F. Michor, Y. Iwasa, and M. Nowak. Dynamics of cancer progression. *Nature*  
121 *Reviews Cancer*, 4:197–205, 2004. doi: 10.1038/nrc1295.

- 122 L. Opasic, D. Zhou, B. Wener, D. Dingli, and A. Traulsen. How many  
123 samples are needed to infer truly clonal mutations from heterogenous tu-  
124 mours? *BMC Cancer*, page 403, 2019. URL [https://doi.org/10.1186/  
125 s12885-019-5597-1](https://doi.org/10.1186/s12885-019-5597-1).
- 126 R. Schwartz and A. Schäffer. The evolution of tumour phylogenetics: principles  
127 and practice. *Nature Reviews Genetics*, 18:213–229, 2017. doi: 10.1038/nrg.  
128 2016.170.
- 129 G. Stanta and S. Bonin. Overview on clinical relevance of intra-tumor het-  
130 erogeneity. *Frontiers in Medicine*, 5:85, 2018. ISSN 2296-858X. doi:  
131 10.3389/fmed.2018.00085. URL [https://www.frontiersin.org/article/  
132 10.3389/fmed.2018.00085](https://www.frontiersin.org/article/10.3389/fmed.2018.00085).
- 133 B. Waclaw, I. Bozic, M. Pittman, R. Hruban, B. Vogelstein, and M. Nowak.  
134 A spatial model predicts that dispersal and cell turnover limit intratumour  
135 heterogeneity. *Nature*, pages 261–264, 2015.
- 136 H. Zafar, N. Navin, L. Nakhleh, and K. Chen. Computational approaches for  
137 inferring tumor evolution from single-cell genomic data. *Current Opinion in  
138 Systems Biology*, pages 16–25, 2018.
